# Supplementary material
Source: publisher figshare collection journal article supplement (https://tandf.figshare.com/ndownloader/files/15214739)

# Main Map 1. Fluvial-flow dominated fan in central Spitsbergen, Svalbard: detailed surface morphology based on unmanned airborne vehicle (UAV) surveys

Aleksandra M. Tomczyk<sup>1</sup>, Marek W. Ewertowski<sup>1</sup>, Monika Stawska<sup>1</sup> and Grzegorz Rachlewicz<sup>2,3</sup>

<sup>1</sup> Faculty of Geographical and Geological Sciences, Adam Mickiewicz University, Poznań, Poland  
<sup>2</sup> Department of Environmental Science, Xi'an Jiaotong-Liverpool University, Suzhou City, China  
<sup>3</sup> AMUPS - Adam Mickiewicz University Polar Station, Petuniabukta, Svalbard

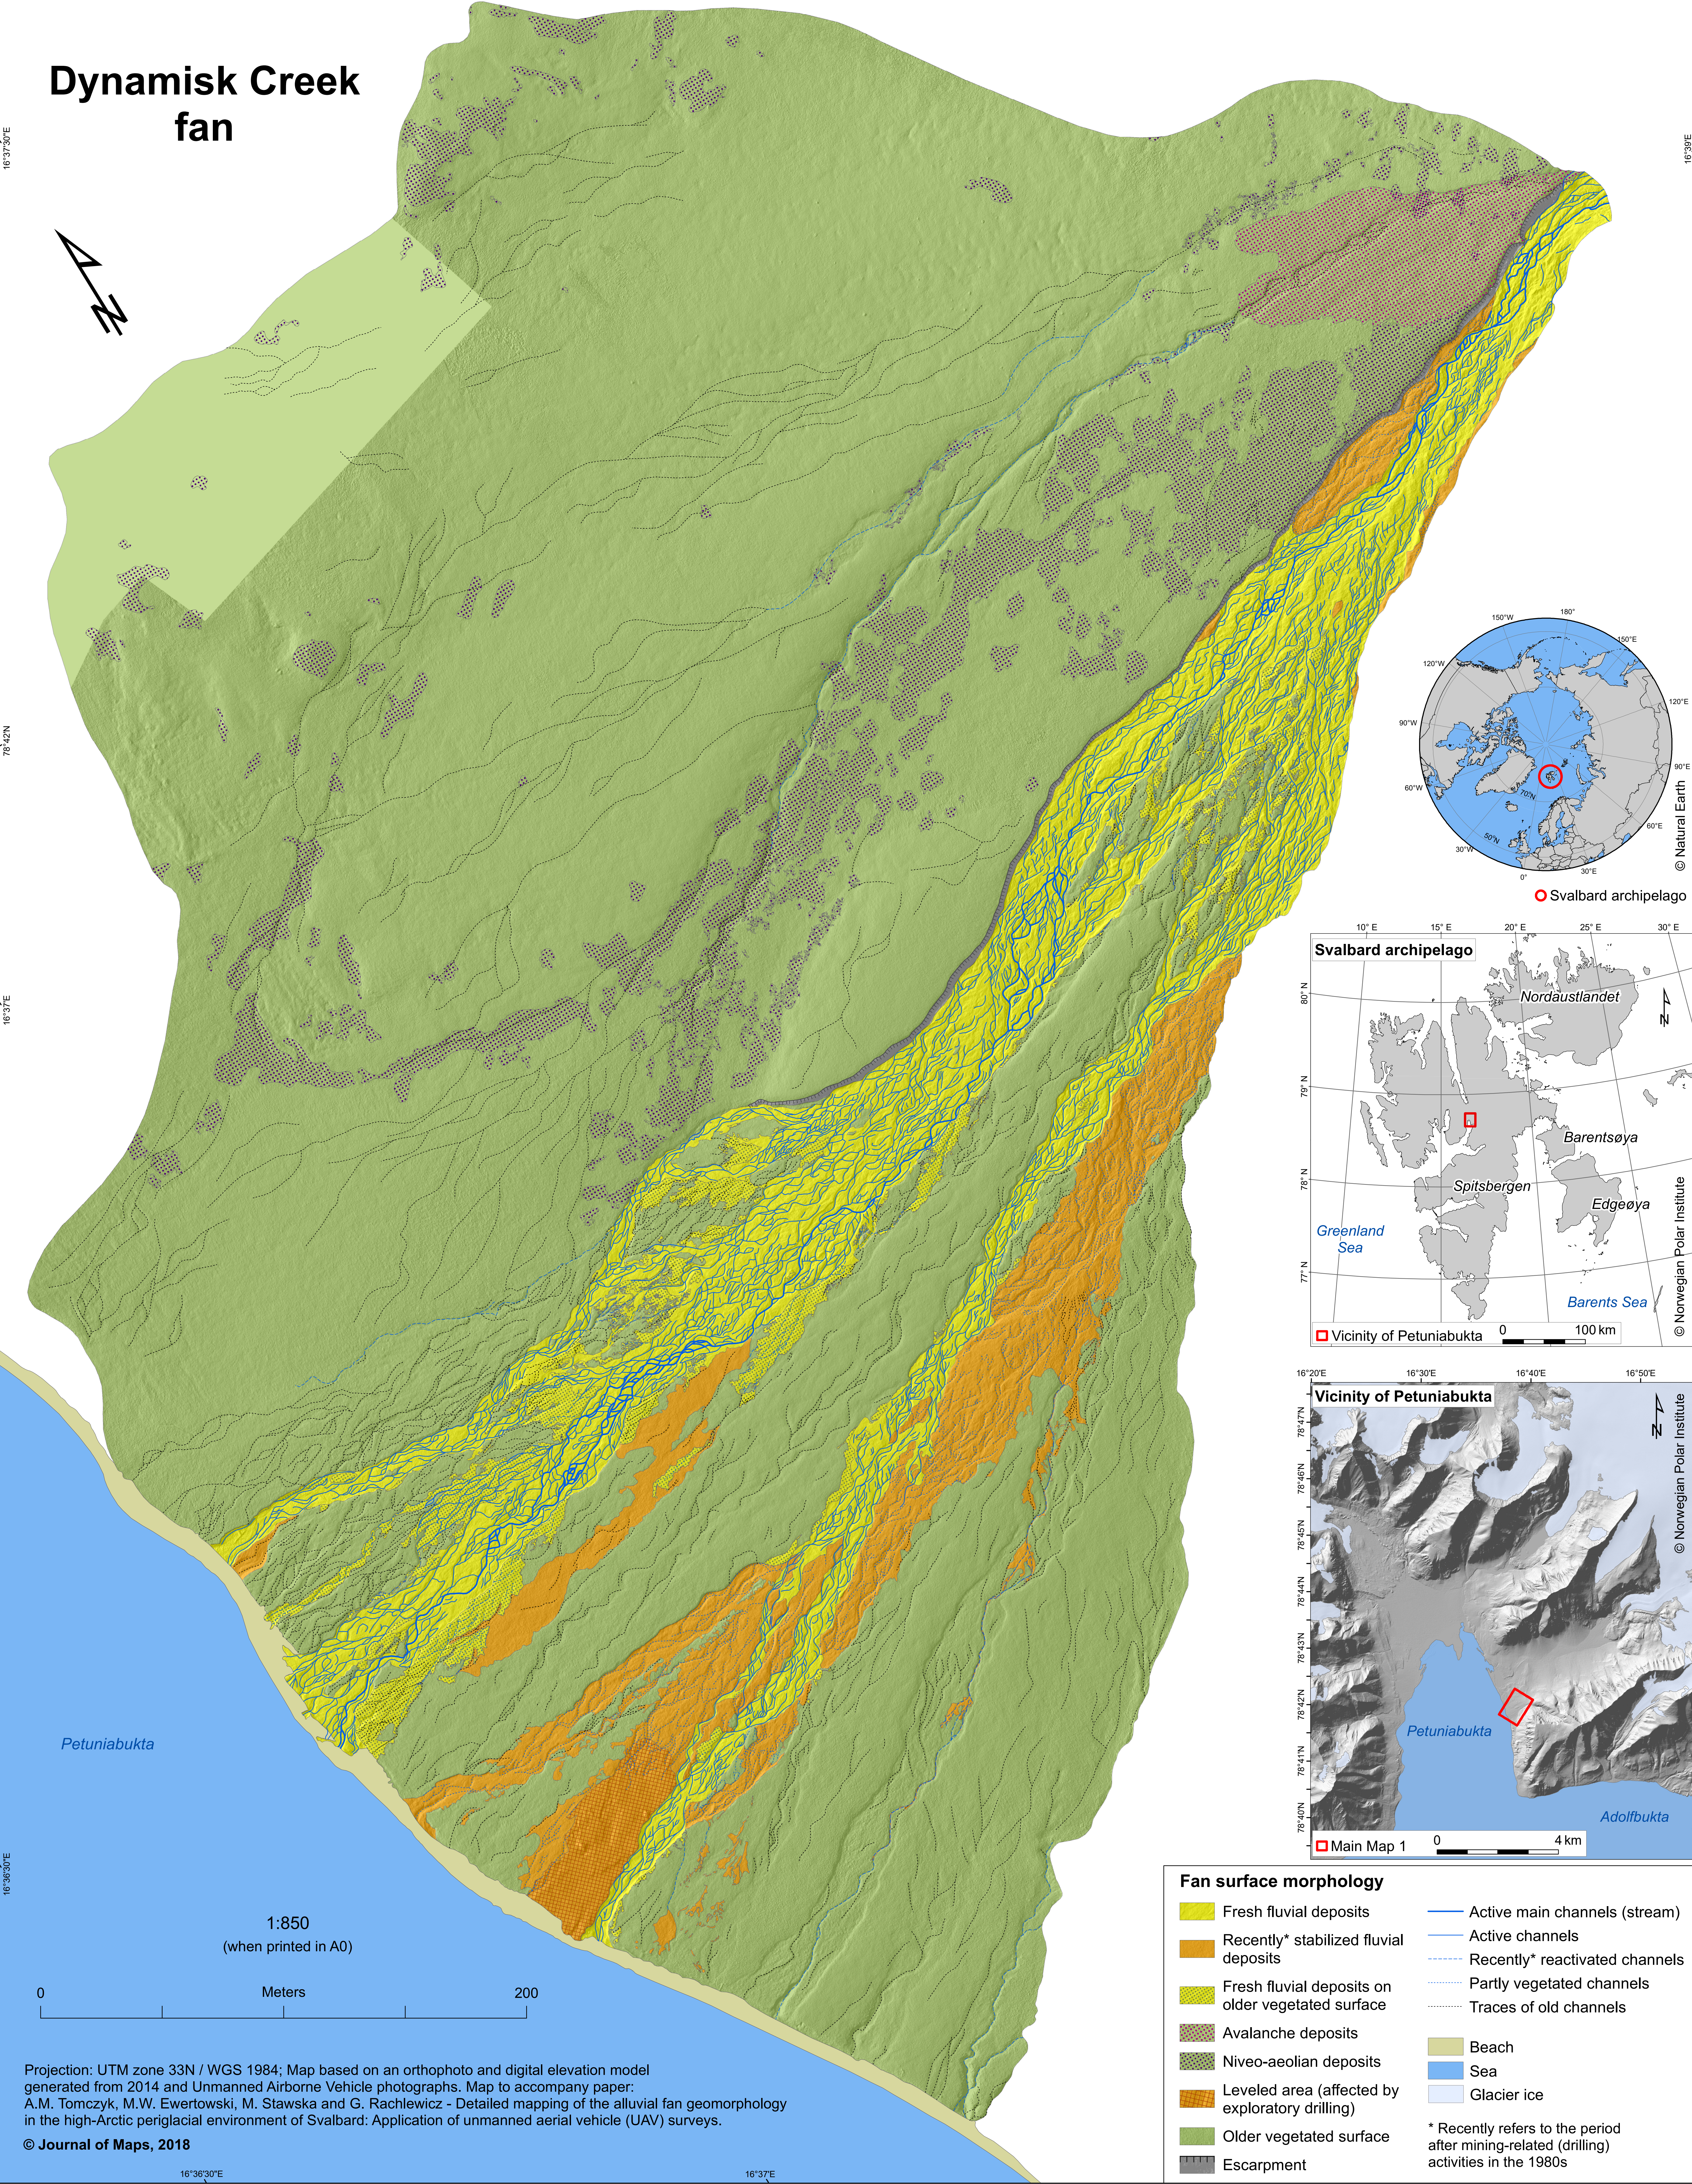

Supplement: Supplementary file 1 [file 15214739]
